# Supplementary material for: A multiplexed miRNA and transgene expression platform for simultaneous repression and expression of protein coding sequences
Source: Royal Society of Chemistry journal article supplement (doi:10.1039/c5mb00506j), 2015-11-23
Supplement: c5mb00506j1.pdf [file c5mb00506j1.pdf]

Supplemental Table 1. Seyhan A

| Intronic-miRNAs | Gene name                           | Gene ID                   | Coordinates (GRCh 38)        | miRNA primer sequences                                                                                                   | PCR product length (bp) | miRNA sequences                                                                                                                     | miRNA targets                         |
|-----------------|-------------------------------------|---------------------------|------------------------------|--------------------------------------------------------------------------------------------------------------------------|-------------------------|-------------------------------------------------------------------------------------------------------------------------------------|---------------------------------------|
| miR-26b         | CTDSP1<br>Nuclear LIM – interact or | <a href="#">NM_182642</a> | chr2: 21840264-218402722 [+] | Forward, 5'-GTCACCATGTCGAGCTCTCAGgtgagggccaggaagaggc<br>Reverse, 5'-TTCTCCTTTACTGGTGACCGCCgctggggggcgggccagtgag          | 630                     | ccgggacccaguucaag<br>uaauucaggauagguug<br>ugugcuguccagccugu<br>ucuccauuacuuggcuc<br>ggggaccgg                                       | miR-26b-5p: 5'-accuauuccgaaucuaucugaa |
| miR-126-5'      | EGFL7                               | <a href="#">NM_201446</a> | chr9: 13667060-136670686 [+] | Forward, 5'-GTCACCATGTCGAGCTCTCAGgtaaacagccctggctgtgc<br>Reverse, 5'-TTCTCCTTTACTGGTGACCGCCgctcggggcagagccaggcgc         | 619                     | cgcuggcgacgggacau<br>uaauacuuiuugguacgc<br>gcugugacacuucaaac<br>ucguaccgugaguaaua<br>augcgcguccacggca                               | miR-126-5p: 5'-cgcuacaaaaguaaauaug    |
| miR-126-3'      | EGFL7                               | <a href="#">NM_201446</a> | chr9: 13667060-136670686 [+] | Same as miR-126-5'                                                                                                       | 619                     | cgcuggcgacgggacau<br>uaauacuuiuugguacgc<br>gcugugacacuucaaac<br>ucguaccgugaguaaua<br>augcgcguccacggca                               | miR-126-3p: 5'-cgcauuuuacucacgguacga  |
| miR-330         | EML2                                | <a href="#">NM_012155</a> | chr19: 4563899-45639087 [-]  | Forward, 5'-GTCACCATGTCGAGCTCTCAGgtgagacccttcgcagacc<br>Reverse, 5'-TTCTCCTTTACTGGTGACCGCCgctgtcagga aaggacaaag          | 483                     | cuuuggcgaucaucugcc<br>ucucugggccugugucu<br>uaggcucugcaagauca<br>accgagcaaaagcacagc<br>ccugcagagaggcagcg<br>cucugccc                 | miR-330-5p: 5'-gccuaagacacagccagagaga |
| miR-423         | <a href="#">CCDC55</a>              | <a href="#">NM_032141</a> | chr17: 30117079-30117172 [+] | Forward, 5'-GTCACCATGTCGAGCTCTCAGgtgagtatccggaggttagg<br>Reverse, 5'-TTCTCCTTTACTGGTGACCGCCgctgcatatat ttttttgaatag      | 1216                    | auaaaggaaguaggcu<br>gaggggcagagagcgcgag<br>acuuuucuauuuuccaa<br>aagcucggucugaggcc<br>ccucagucuugcuuccu<br>aaccgcgc                  | miR-423-5p: 5'-aaagucucgcucucugcccuca |
| miR-7-1         | <a href="#">HNRPK</a>               | <a href="#">NM_031262</a> | chr9: 83969748-83969857 [-]  | Forward, 5'-GTCACCATGTCGAGCTCTCAGgtcagtttaagtttagctttgtg<br>Reverse, 5'-TTCTCCTTTACTGGTGACCGCCgctataaaaa agaaaaatatcttgc | 781                     | uuggauguuggccuagu<br>ucuguguggaagacuag<br>ugauuuuguuuuuuu<br>agauaacuaaaucgacaa<br>caaaucacagucgcca<br>auggcacaggccaugcc<br>ucuacag | miR-7-1-5p: 5'-acaacaaaucacuaugucucca |

|                                |                      |                                 |                               |                                                                                                                                                                     |                                |                                                                             |                                         |
|--------------------------------|----------------------|---------------------------------|-------------------------------|---------------------------------------------------------------------------------------------------------------------------------------------------------------------|--------------------------------|-----------------------------------------------------------------------------|-----------------------------------------|
| miR-208a-3'                    | <u>MYH6</u>          | <u>NM_002471</u>                | chr14: 2338859-2338866 [-]    | Forward, 5'-gagctccaccgcgggACCA TGTCGAGCTCTCAG gtgagctccagataccccc Reverse, 5'-TTCTCCTTTACTGGT GACCGCCgcctgccagg tgagggtgg                                          | 520                            | ugacgggcgagcuuuug gccccgguuauaccuga ugcucacguauaagacg agcaaaaagcuuguugg uca | miR-208a-3p: 5'-acaagcuuuuugcuc gucuauu |
| <b>Intronic-cluster miRNAs</b> | <b>Gene name</b>     | <b>Gene ID</b>                  | <b>Coordinates (GRCh 38)</b>  | <b>miRNA primer sequences</b>                                                                                                                                       | <b>PCR product length (bp)</b> | <b>mirna sequences</b>                                                      | <b>miRNA targets</b>                    |
| miR-302a-5'                    | AGEN COURT_13961_480 | BU858794                        | chr4: 112648183-112648251 [-] | Forward, 5'-GTCACCATGTTCGAG CTCTCAG/gtaa aaaaattttt ttctctaa ggttatg Reverse, 5'-TTCTCCTTTACTGGT GACCGCCgc/ctagctccc gatcaaaagtaaag. (/ indicates splice junctions) | 1186                           | ccaccacuuaaacgugga uguacuugcuuugaaac uaaagaaguaagugcuu ccauguuuuggugaugg    | miR-302a-5p: uaaacguggauguac uugcuuu    |
| miR-302a-3'                    | AGEN COURT_13961_480 | CD173735 BU858794               | chr4: 112648183-112648251 [-] | Same as miR-302a-5'                                                                                                                                                 | 1186                           | ccaccacuuaaacgugga uguacuugcuuugaaac uaaagaaguaagugcuu ccauguuuuggugaugg    | miR-302a-3p: ucacaaaacaugga agcacuua    |
| miR-302b-5'                    | AGEN COURT_13961_480 | <u>CD173735</u> <u>BU858794</u> | chr4: 112648183-112648557 [-] | Same as miR-302a-5'                                                                                                                                                 | 1186                           | gcucccuuaacuuuaa cauggaagugcuuucug ugacuuuaaaaguaagu gcuccaaguuuuagua ggagu | miR-302b-5p: acuuuaacauggaag ugcuuuu    |
| miR-302b-3'                    | AGEN COURT_13961_480 | <u>CD173735</u> <u>BU858794</u> | chr4: 112648485-112648557 [-] | Same as miR-302a-5'                                                                                                                                                 | 1186                           | gcucccuuaacuuuaa cauggaagugcuuucug ugacuuuaaaaguaagu gcuccaaguuuuagua ggagu | miR-302b-3p: cuacuaaaacaugga agcacuua   |
| miR-302c-5'                    | AGEN COURT_13961_480 | <u>CD173735</u> <u>BU858794</u> | chr4: 112648363-112648430 [-] | Same as miR-302a-5'                                                                                                                                                 | 1186                           | ccuuugcuuuaacaugg ggguaaccugcuguguga acaaaaaguaagugcuu ccauguuucaguggagg    | miR-302c-5p: cagcagguaccccau guuaaa     |
| miR-302c-3'                    | AGEN COURT_13961_480 | <u>CD173735</u> <u>BU858794</u> |                               | Same as miR-302a-5'                                                                                                                                                 | 1186                           | ccuuugcuuuaacaugg ggguaaccugcuguguga acaaaaaguaagugcuu ccauguuucaguggagg    | miR-302c-3p: ccacugaaacaugga agcacuua   |
| miR-302d-3'                    | AGEN COURT_13961_480 | <u>CD173735</u> <u>BU858794</u> | chr4: 112648004-112648071 [-] | Same as miR-302a-5'                                                                                                                                                 | 1186                           | ccucuacuuuaacaugg aggcacuugcugugaca ugacaaaaaaagugcu uccauguuugagugugg      | miR-302d: acacuaaaacaugga agcacuua      |

|            |                                |                                                                                                |                                              |                                                                                                                                                                                                       |      |                                                                                                     |                                        |
|------------|--------------------------------|------------------------------------------------------------------------------------------------|----------------------------------------------|-------------------------------------------------------------------------------------------------------------------------------------------------------------------------------------------------------|------|-----------------------------------------------------------------------------------------------------|----------------------------------------|
| miR-367-3p | AGEN<br>COURT<br>_13961<br>480 | <u>CD173</u><br><u>735</u><br><u>BU858</u><br><u>794</u>                                       | chr4:<br>112647<br>874-<br>112647<br>941 [-] | Same as miR-302a-5'                                                                                                                                                                                   | 1186 | ccaauacuguugcuaau<br>augcaacucuguugaau<br>auaaaauuggaaugcac<br>uuuagcaauggugaugg                    | miR-367:<br>ucaccauugcuaaag<br>ugcaauu |
| miR106b    | <u>MCM7</u>                    | <u>NM_0</u><br><u>05916</u><br><u>7:993</u><br><u>36267-</u><br><u>99336</u><br><u>348 (-)</u> | chr7:<br>100093<br>993-<br>100094<br>074 [-] | Forward, 5'-<br>gagctccaccgcgggACCA<br>TGTCGAGCTCTCAG/<br>gtaagtgccaaattgctggag<br>and<br>Reverse, 5'-<br>TTCTCCTTTACTGGT<br>GACCGCCgc/cta<br>aggggaaggt aggggg (/,<br>indicates splice<br>junctions) | 771  | ccugccggggcuaaagu<br>gcugacagugcagauag<br>ugguccucuccugcua<br>ccgcacugugguacuu<br>gcugucccagcagg    | miR-106b:<br>aucugcacugucagc<br>acuuua |
| miR-93     | <u>MCM7</u>                    | <u>NM_0</u><br><u>05916</u><br>7:9933<br>6042-<br>99336<br>121                                 | chr7:<br>100093<br>768-<br>100093<br>847 [-] | Same as miR-106b                                                                                                                                                                                      | 771  | cugggggcucaaaagug<br>cuguucgucagguagu<br>gugauuaccaaccuac<br>ugcugagcuagcacuuc<br>ccgagcccccg       | miR-93:<br>cuaccuhcachaaca<br>hcacuuug |
| miR-25     | <u>MCM7</u>                    | <u>NM_0</u><br><u>05916</u><br><u>7:9933</u><br><u>5834-</u><br><u>99335</u><br><u>917</u>     | chr7:<br>100093<br>560-<br>100093<br>643 [-] | Same as miR-106b                                                                                                                                                                                      | 771  | ggccaguguugagaggc<br>ggagacuugggcaauug<br>cuggacgucgccuggg<br>cauugcacuugucucgg<br>ucugacagugccggcc | miR-25:<br>ucagaccgagacaag<br>ugcaaug  |

**Supplementary Table 1.** List of human intronic and non-intronic single and cluster miRNAs, gene IDs, coordinates, and all the sequence information on the primers, miRNAs and miRNA targets.
